# Supplementary material for: Proteomic Profiling of Plasma- and Gut-Derived Extracellular Vesicles in Obesity
Source: MDPI journal article supplement (doi:10.3390/nu16050736), 2024-03-04
Supplement: s1 [file s1]

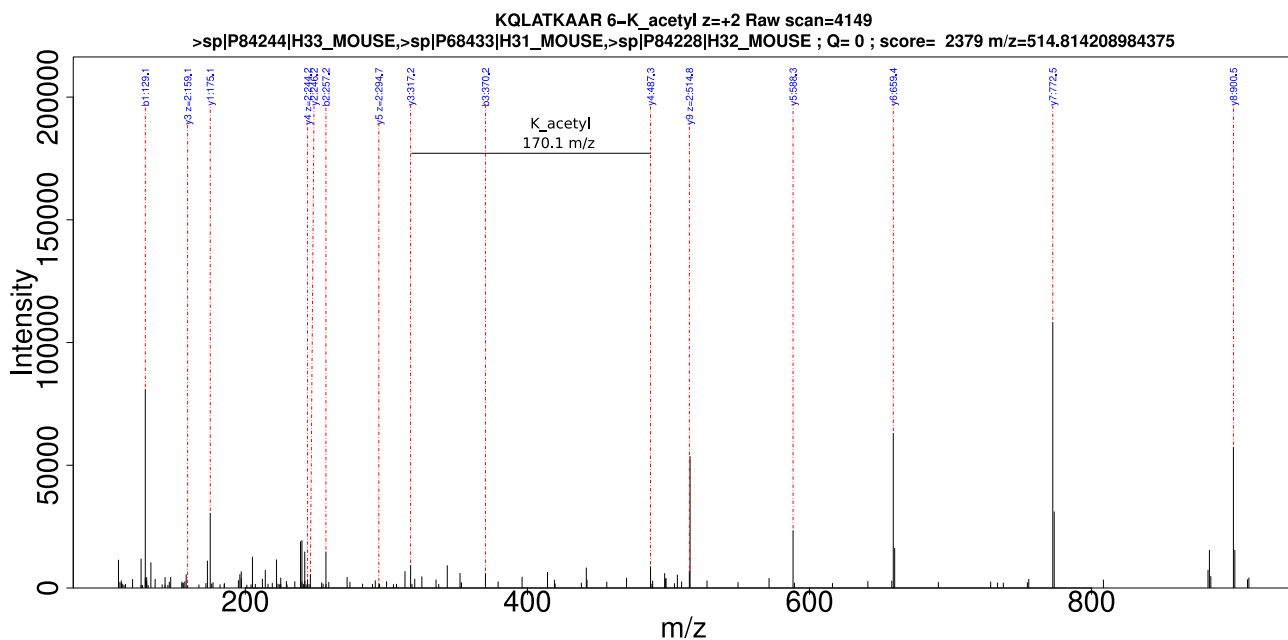

Figure S1: Examples of annotated raw spectrum of identified lysine acetylation site.

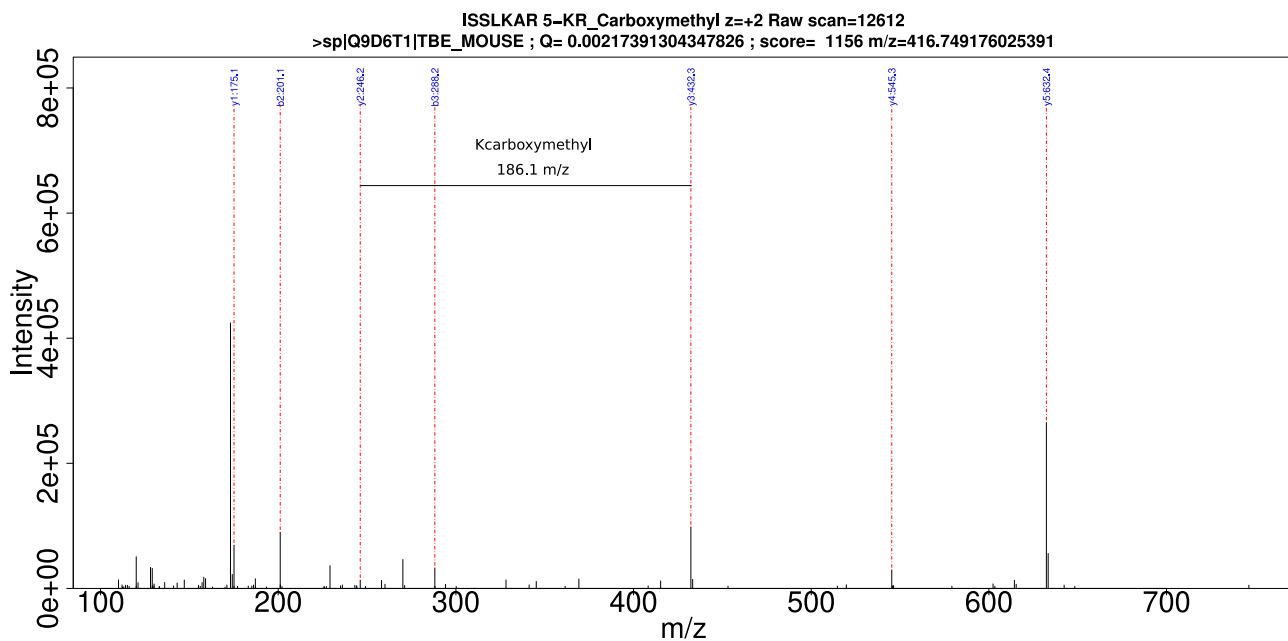

Figure S2: Examples of annotated raw spectrum of identified lysine glycation site.

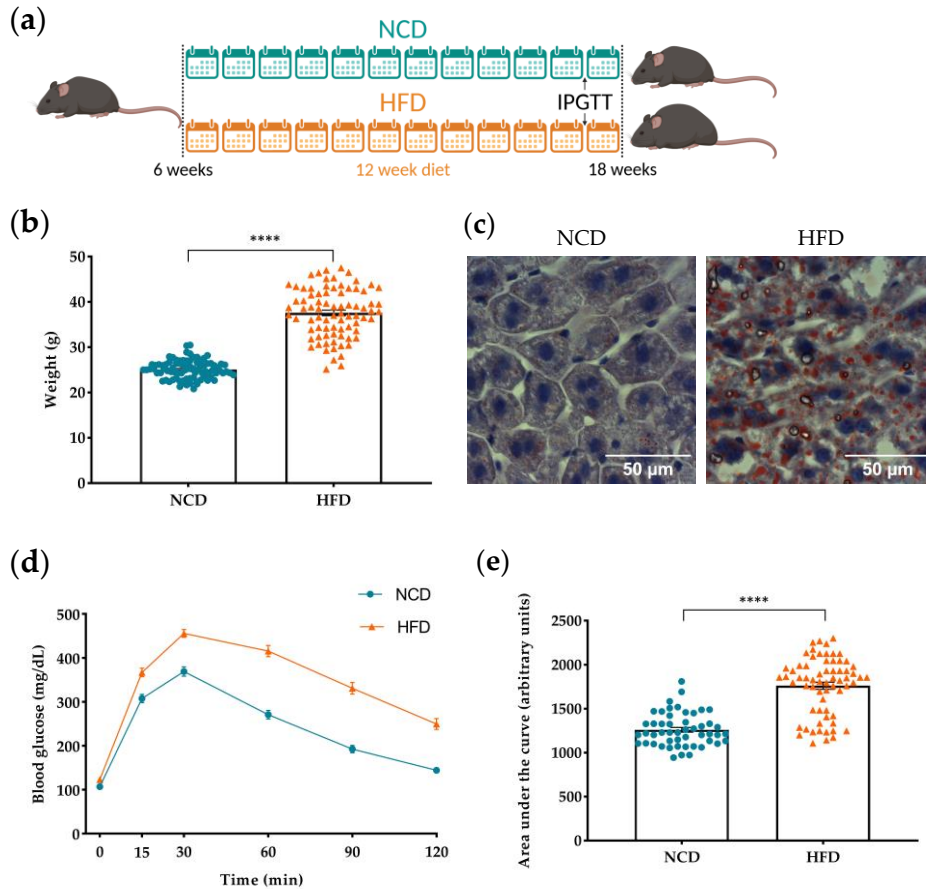

**Figure S3: Diet-induced obese mouse model characterization.**

(a) Schematic representation of the 12-week diet plan. Obesity was induced in male C57Bl/6J mice by feeding them a high fat diet (HFD), while control mice were fed a normal chow diet (NCD). At the 11th week of diet, mice are subjected to intra-peritoneal glucose tolerance test (ipGTT). (b) Statistical analysis of mouse body weight (circles indicate individual animals). (c) Hematoxylin and eosin + Oil Red O staining in liver, histological sections of NCD and HFD mice with 63X magnification. (d) Representation of ipGTT at different time points after glucose administration (0, 15, 30, 60, 90, 120 minutes). (e) Statistical analysis of the area under the curve of the ipGTT graph (circles indicate individual animals; n=60 for NCD and n=70 for HFD).

All statistical analysis were performed using Unpaired t-test with Welch's correction. All data are presented as mean  $\pm$  standard error of the mean. \*\*\*\* P-value < 0.0001.



**Table S1: List of 112 protein exclusively identified in Plasma EVs from NCD mice relative to Figure 2b and Figure 3.**

| Protein                                                   | Gene     | False Discovery Rate |
|-----------------------------------------------------------|----------|----------------------|
| 14-3-3 protein eta                                        | Ywhah    | 0                    |
| 14-3-3 protein gamma                                      | Ywhag    | 0.00784313725490196  |
| 14-3-3 protein theta                                      | Ywhaq    | 0                    |
| 4-trimethylaminobutyraldehyde dehydrogenase               | Aldh9a1  | 0                    |
| Adenosylhomocysteinase                                    | Ahcy     | 0                    |
| Adenylyl cyclase-associated protein 1                     | Cap1     | 0                    |
| Adiponectin                                               | Adipoq   | 0                    |
| Afamin                                                    | Afm      | 0                    |
| Alcohol dehydrogenase 1                                   | Adh1     | 0                    |
| Alpha-2-HS-glycoprotein                                   | Ahsg     | 0                    |
| Angiopoietin-related protein 6                            | Angptl6  | 0                    |
| Annexin A7                                                | Anxa7    | 0                    |
| Argininosuccinate synthase                                | Ass1     | 0                    |
| Basigin                                                   | Bsg      | 0                    |
| Bleomycin hydrolase                                       | Blmh     | 0.00699300699300699  |
| Calmodulin-1                                              | Calm1    | 0                    |
| Calmodulin-2                                              | Calm2    | 0                    |
| Calmodulin-3                                              | Calm3    | 0                    |
| Calmodulin-like protein 3                                 | Calml3   | 0                    |
| Caveolin-1                                                | Cav1     | 0                    |
| Cholinesterase                                            | Bche     | 0                    |
| Coagulation factor XIII B chain                           | F13b     | 0                    |
| Collectin-11                                              | Colec11  | 0                    |
| Complement factor H                                       | Cfh      | 0                    |
| C-reactive protein                                        | Crp      | 0                    |
| Creatine kinase U-type, mitochondrial                     | Ckmt1    | 0                    |
| Delta-aminolevulinic acid dehydratase                     | Alad     | 0                    |
| Endoplasmic reticulum chaperone BiP                       | Hspa5    | 0                    |
| Estradiol 17 beta-dehydrogenase 5                         | Akr1c6   | 0                    |
| Estradiol 17-beta-dehydrogenase 11                        | Hsd17b11 | 0                    |
| Gelsolin                                                  | Gsn      | 0                    |
| Glial fibrillary acidic protein                           | Gfap     | 0                    |
| Glutathione peroxidase 3                                  | Gpx3     | 0                    |
| Glyceraldehyde-3-phosphate dehydrogenase                  | Gapdh    | 0                    |
| Glyceraldehyde-3-phosphate dehydrogenase, testis-specific | Gapdhs   | 0                    |
| Guanine nucleotide-binding protein G(o) subunit alpha     | Gnao1    | 0                    |
| Guanine nucleotide-binding protein subunit alpha-12       | Gna12    | 0                    |
| Guanine nucleotide-binding protein subunit alpha-13       | Gna13    | 0                    |
| Heat shock 70 kDa protein 1A                              | Hspa1a   | 0                    |

**Table S1 (continuation): List of 112 protein exclusively identified in Plasma EVs from NCD mice relative to Figure 2b and Figure 3.**

| Protein                                        | Gene    | False Discovery Rate |
|------------------------------------------------|---------|----------------------|
| Heat shock 70 kDa protein 1B                   | Hspa1b  | 0                    |
| Heat shock 70 kDa protein 1-like               | Hspa1l  | 0                    |
| Heat shock cognate 71 kDa protein              | Hspa8   | 0                    |
| Heat shock-related 70 kDa protein 2            | Hspa2   | 0                    |
| Hemoglobin subunit epsilon-Y2                  | Hbb-y   | 0.00706713780918728  |
| Hemoglobin subunit zeta                        | Hbz     | 0                    |
| Histidine-rich glycoprotein                    | Hrg     | 0                    |
| Ig gamma-2A chain C region secreted form       | -       | 0                    |
| Ig heavy chain V region TEPC 1017              | -       | 0.00701754385964912  |
| Ig heavy chain V region UPC10                  | -       | 0                    |
| Ig kappa chain V region Mem5 (Fragment)        | -       | 0                    |
| Ig kappa chain V-II region MOPC 511            | -       | 0                    |
| Ig kappa chain V-II region VKappa167           | Gm5153  | 0                    |
| Ig kappa chain V-VI region NQ6-8.3.1           | -       | 0                    |
| Inhibitor of carbonic anhydrase                | Ica     | 0                    |
| Integrin beta-1                                | Itgb1   | 0                    |
| Katanin p60 ATPase-containing subunit A-like 2 | Katnal2 | 0.00696864111498258  |
| Keratin, type I cuticular Ha1                  | Krt31   | 0                    |
| Keratin, type I cuticular Ha2                  | Krt32   | 0                    |
| Keratin, type I cuticular Ha3-II               | Krt33b  | 0                    |
| Keratin, type I cuticular Ha5                  | Krt35   | 0                    |
| Keratin, type I cuticular Ha6                  | Krt36   | 0                    |
| Keratin, type I cytoskeletal 24                | Krt24   | 0                    |
| Keratin, type I cytoskeletal 25                | Krt25   | 0                    |
| Keratin, type I cytoskeletal 27                | Krt27   | 0                    |
| Keratin, type I cytoskeletal 28                | Krt28   | 0                    |
| Keratin, type I cytoskeletal 40                | Krt40   | 0                    |
| Keratin, type II cuticular 87                  | Krt87   | 0                    |
| Keratin, type II cuticular Hb1                 | Krt81   | 0                    |
| Keratin, type II cuticular Hb5                 | Krt85   | 0                    |
| Keratin, type II cuticular Hb6                 | Krt86   | 0                    |
| Kininogen-1                                    | Kn1     | 0                    |
| Lactadherin                                    | Mfge8   | 0                    |
| Leukocyte surface antigen CD47                 | Cd47    | 0                    |
| LIM/homeobox protein Lhx2                      | Lhx2    | 0                    |
| LIM/homeobox protein Lhx9                      | Lhx9    | 0                    |
| Mannan-binding lectin serine protease 1        | Masp1   | 0                    |
| Mannose-binding protein A                      | Mbl1    | 0                    |
| Microtubule-associated protein 9               | Map9    | 0                    |

**Table S1 (continuation): List of 112 protein exclusively identified in Plasma EVs from NCD mice relative to Figure 2b and Figure 3.**

| <b>Protein</b>                                                  | <b>Gene</b> | <b>False Discovery Rate</b> |
|-----------------------------------------------------------------|-------------|-----------------------------|
| Myosin light polypeptide 6                                      | Myl6        | 0.00711743772241993         |
| Myosin-9                                                        | Myh9        | 0                           |
| Neurofilament heavy polypeptide                                 | Nefh        | 0.00704225352112676         |
| Peptidyl-prolyl cis-trans isomerase A                           | Ppia        | 0                           |
| Peroxiredoxin-2                                                 | Prdx2       | 0                           |
| Pituitary tumor-transforming gene 1 protein-interacting protein | Pttg1ip     | 0                           |
| Platelet glycoprotein Ib beta chain                             | Gp1bb       | 0.00775193798449612         |
| Properdin                                                       | Cfp         | 0                           |
| Proteasome subunit alpha type-4                                 | Psma4       | 0                           |
| Proteasome subunit alpha type-6                                 | Psma6       | 0                           |
| Proteasome subunit beta type-2                                  | Psmb2       | 0                           |
| Proteasome subunit beta type-3                                  | Psmb3       | 0                           |
| Proteasome subunit beta type-4                                  | Psmb4       | 0                           |
| Proteasome subunit beta type-5                                  | Psmb5       | 0                           |
| Proteasome subunit beta type-7                                  | Psmb7       | 0                           |
| Proteasome subunit beta type-8                                  | Psmb8       | 0                           |
| Pyruvate kinase PKM                                             | Pkm         | 0                           |
| Ras-related protein Rab-21                                      | Rab21       | 0                           |
| Ras-related protein Rap-1b                                      | Rap1b       | 0                           |
| Secretoglobin family 2B member 2                                | Scgb2b2     | 0                           |
| Serine protease inhibitor A3C                                   | Serpina3c   | 0                           |
| Serine protease inhibitor A3F                                   | Serpina3f   | 0                           |
| Serine protease inhibitor A3G                                   | Serpina3g   | 0                           |
| Serine protease inhibitor A3N                                   | Serpina3n   | 0                           |
| Sorcin                                                          | Sri         | 0                           |
| Spermatogenesis-associated serine-rich protein 2                | Spats2      | 0                           |
| T-complex protein 1 subunit beta                                | Cct2        | 0                           |
| T-complex protein 1 subunit delta                               | Cct4        | 0                           |
| T-complex protein 1 subunit gamma                               | Cct3        | 0                           |
| T-complex protein 1 subunit theta                               | Cct8        | 0                           |
| TRAF3-interacting protein 1                                     | Traf3ip1    | 0                           |
| Transferrin receptor protein 1                                  | Tfrc        | 0                           |
| Vimentin                                                        | Vim         | 0                           |
| von Willebrand factor                                           | Vwf         | 0                           |

**Table S2: List of 4 proteins shared between NCD and HFD plasma EVs, but exclusively acetylated in NCD plasma EVs, relative to the Venn Diagram in Figure 5a.**

| Proteins                         | Gene  | False Discovery Rate |
|----------------------------------|-------|----------------------|
| Actin, cytoplasmic 2             | Actg1 | 0                    |
| Immunoglobulin heavy constant mu | Ighm  | 0.000499875031242189 |
| Major vault protein              | Mvp   | 0                    |
| Pregnancy zone protein           | Pzp   | 0                    |

**Table S3: List of 6 Proteins shared between NCD and HFD plasma EVs, but exclusively glycosylated in NCD plasma EVs, relative to the Venn Diagram in Figure 5b.**

| Proteins                       | Gene       | False Discovery Rate |
|--------------------------------|------------|----------------------|
| Ig alpha chain C region        | -          | 0                    |
| Ig heavy chain V region 1-62-3 | Ighv1-62-3 | 0.00277777777777778  |
| Ig heavy chain V region 1-72   | Ighv1-72   | 0.00277777777777778  |
| Immunoglobulin kappa constant  | Igkc       | 0.00252684775742262  |
| Pregnancy zone protein         | Pzp        | 0                    |
| Serum albumin                  | Alb        | 0.00715563506261181  |

**Table S4: List of 41 proteins shared between NCD and HFD gut EVs, but exclusively acetylated in NCD gut EVs, relative to the Venn Diagram in Figure 5c.**

| Proteins                                                               | Gene    | False Discovery Rate |
|------------------------------------------------------------------------|---------|----------------------|
| 14-3-3 protein zeta/delta                                              | Ywhaz   | 0.00929639081297849  |
| Actin-related protein 2/3 complex subunit 1A                           | Arpc1a  | 0                    |
| Adenylosuccinate synthetase isozyme 2                                  | Adss    | 0.00227473777328447  |
| Adenylyl cyclase-associated protein 1                                  | Cap1    | 0                    |
| Alanine--tRNA ligase, cytoplasmic                                      | Aars    | 0.00592665761205087  |
| Arginine--tRNA ligase, cytoplasmic                                     | Rars    | 0.0033945378799568   |
| Bifunctional glutamate/proline--tRNA ligase                            | Eprs    | 0                    |
| Calcium/calmodulin-dependent protein kinase type II subunit delta      | Camk2d  | 0.0066119750214277   |
| Calponin-1                                                             | Cnn1    | 0.00268296318378298  |
| cGMP-dependent protein kinase 1                                        | Prkg1   | 0.00400266844563042  |
| Chloride intracellular channel protein 4                               | Clic4   | 0.00241879751209399  |
| Cofilin-2                                                              | Cfl2    | 0                    |
| Dynactin subunit 3                                                     | Dctn3   | 0.000326850792613172 |
| Eukaryotic initiation factor 4A-III                                    | Eif4a3  | 0                    |
| Eukaryotic translation initiation factor 3 subunit E                   | Eif3e   | 0                    |
| Fatty acid-binding protein, adipocyte                                  | Fabp4   | 0                    |
| F-box-like/WD repeat-containing protein TBL1XR1                        | Tbl1xr1 | 0                    |
| Ferritin light chain 1                                                 | Ftl1    | 0.00239005736137667  |
| Ferritin light chain 2                                                 | Ftl2    | 0.00239005736137667  |
| Glutathione synthetase                                                 | Gss     | 0                    |
| Glycogen phosphorylase, liver form                                     | Pygl    | 0.00788314398330628  |
| Ketosamine-3-kinase                                                    | Fn3krp  | 0.00182815356489945  |
| LIM and senescent cell antigen-like-containing domain protein 2        | Lims2   | 0.00524590163934426  |
| MOB kinase activator 1B                                                | Mob1b   | 0.00713545862584877  |
| N-acetyl-D-glucosamine kinase                                          | Nagk    | 0                    |
| Nucleoside diphosphate kinase B                                        | Nme2    | 0.00681609647398086  |
| Phosphoglycerate kinase 1                                              | Pgk1    | 0.00225790265930758  |
| Protein SGT1 homolog                                                   | Sugt1   | 0                    |
| Purine nucleoside phosphorylase                                        | Pnp     | 0.00247875354107649  |
| Ribonuclease inhibitor                                                 | Rnh1    | 0                    |
| RNA polymerase-associated protein RTF1 homolog                         | Rtf1    | 0.00136495478587272  |
| Serine/threonine-protein phosphatase 2B catalytic subunit beta isoform | Ppp3cb  | 0.00884857869704679  |
| Serine/threonine-protein phosphatase CPPED1                            | Cpped1  | 0                    |
| Signal transducer and activator of transcription 1                     | Stat1   | 0                    |
| START domain-containing protein 10                                     | Stard10 | 0.0022312090363966   |
| Sulfotransferase family cytosolic 1B member 1                          | Sult1b1 | 0.00370313223268014  |
| Thyroid hormone-inducible hepatic protein                              | Thrsp   | 0                    |
| Transitional endoplasmic reticulum ATPase                              | Vcp     | 0                    |
| Tripeptidyl-peptidase 2                                                | Tpp2    | 0.0069609818648104   |
| Ubiquitin-conjugating enzyme E2 variant 1                              | Ube2v1  | 0                    |
| UDP-N-acetylhexosamine pyrophosphorylase                               | Uap1    | 0.00226986128625473  |



**Table S5: List of 29 proteins shared between NCD and HFD gut EVs, but exclusively acetylated in HFD gut EVs, relative to the Venn Diagram in Figure 5c and Figure 6.**

| Proteins                                                   | Gene      | False Discovery Rate |
|------------------------------------------------------------|-----------|----------------------|
| Acyl-coenzyme A thioesterase 4                             | Acot4     | 0.00382667416994935  |
| Alpha-enolase                                              | Eno1      | 0                    |
| Alpha-mannosidase 2C1                                      | Man2c1    | 0.000421496311907271 |
| COP9 signalosome complex subunit 3                         | Cops3     | 0                    |
| DNA-directed RNA polymerases I, II, and III subunit RPABC3 | Polr2h    | 0                    |
| Endoribonuclease LACTB2                                    | Lactb2    | 0.00104675505931612  |
| F-box only protein 22                                      | Fbxo22    | 0.00901135083614938  |
| Galectin-2                                                 | Lgals2    | 0.00903274369589763  |
| Gelsolin                                                   | Gsn       | 0.00206947524020695  |
| Glutathione S-transferase A1                               | Gsta1     | 0.000643500643500644 |
| Glutathione S-transferase A2                               | Gsta2     | 0.000643500643500644 |
| GMP synthase [glutamine-hydrolyzing]                       | Gmps      | 0.00158982511923688  |
| Histone H2B type 1-C/E/G                                   | Hist1h2bc | 0                    |
| Histone H2B type 1-F/J/L                                   | Hist1h2bf | 0                    |
| Histone H2B type 1-K                                       | Hist1h2bk | 0                    |
| Histone H2B type 1-M                                       | Hist1h2bm | 0                    |
| Histone H2B type 1-P                                       | Hist1h2bp | 0                    |
| Histone H2B type 2-B                                       | Hist2h2bb | 0.000985059924478739 |
| Histone H2B type 2-E                                       | Hist2h2be | 0                    |
| Histone H2B type 3-B                                       | Hist3h2bb | 0                    |
| Histone H3.3C                                              | H3f3c     | 0                    |
| Histone H4                                                 | Hist1h4a  | 0                    |
| Nuclear protein localization protein 4 homolog             | Nploc4    | 0.00573065902578797  |
| Peptidyl-prolyl cis-trans isomerase D                      | Ppid      | 0                    |
| Phosphoribosyl pyrophosphate synthase-associated protein 1 | Prpsap1   | 0.00719144800777454  |
| Proteasome assembly chaperone 3                            | Psmg3     | 0.0093143596377749   |
| Staphylococcal nuclease domain-containing protein 1        | Snd1      | 0                    |
| Ubiquitin-fold modifier-conjugating enzyme 1               | Ufc1      | 0.00932528798683489  |
| WD repeat-containing protein 61                            | Wdr61     | 0.00367225154923112  |

**Table S6: List of 23 proteins shared between NCD and HFD gut EVs, but exclusively glycosylated in NCD gut EVs, relative to the Venn Diagram in Figure 5d and Figure 6.**

| <b>Proteins</b>                                | <b>Gene</b> | <b>False Discovery Rate</b> |
|------------------------------------------------|-------------|-----------------------------|
| Actin, alpha cardiac muscle 1                  | Actc1       | 0.00101643232254786         |
| Actin, aortic smooth muscle                    | Acta2       | 0.00101643232254786         |
| Actin, gamma-enteric smooth muscle             | Actg2       | 0.00101643232254786         |
| Alcohol dehydrogenase 1                        | Adh1        | 0.00989779451317913         |
| AMP deaminase 2                                | Ampd2       | 0.00973957230573788         |
| Complement C3                                  | C3          | 0.00164122763827343         |
| Ferritin heavy chain                           | Fth1        | 0.00346658000216661         |
| Fructose-bisphosphate aldolase B               | Aldob       | 0.00392097722817071         |
| Histone H2B type 1-B                           | Hist1h2bb   | 0.00688182249644044         |
| Histone H2B type 1-C/E/G                       | Hist1h2bc   | 0.00688182249644044         |
| Histone H2B type 1-F/J/L                       | Hist1h2bf   | 0.00688182249644044         |
| Histone H2B type 1-H                           | Hist1h2bh   | 0.00688182249644044         |
| Histone H2B type 1-K                           | Hist1h2bk   | 0.00688182249644044         |
| Histone H2B type 1-M                           | Hist1h2bm   | 0.00688182249644044         |
| Histone H2B type 1-P                           | Hist1h2bp   | 0.00688182249644044         |
| Histone H2B type 2-B                           | Hist2h2bb   | 0.00688182249644044         |
| Host cell factor 1                             | Hcfc1       | 0                           |
| Selenium-binding protein 2                     | Selenbp2    | 0                           |
| Serine hydroxymethyltransferase, mitochondrial | Shmt2       | 0.00891304347826087         |
| Serum albumin                                  | Alb         | 0.00221647580347248         |
| Thrombospondin-1                               | Thbs1       | 0.00710276091190285         |
| Transketolase                                  | Tkt         | 0.00529567519858782         |
| Valine--tRNA ligase                            | Vars        | 0.00247480996994874         |

**Table S7: List of 22 proteins shared between NCD and HFD gut EVs, but exclusively glycosylated in HFD gut EVs, relative to the Venn Diagram in Figure 5d and Figure 6.**

| <b>Proteins</b>                            | <b>Gene</b> | <b>False Discovery Rate</b> |
|--------------------------------------------|-------------|-----------------------------|
| 14-3-3 protein zeta/delta                  | Ywhaz       | 0.00903725562523054         |
| 60S ribosomal protein L5                   | Rpl5        | 0.00813522552652987         |
| Actin, cytoplasmic 1                       | Actb        | 0.00354649229746204         |
| Actin, cytoplasmic 2                       | Actg1       | 0.00354649229746204         |
| Aldehyde dehydrogenase family 1 member A3  | Aldh1a3     | 0.00462737457379445         |
| Alpha-2-macroglobulin-P                    | A2m         | 0.00442323361657549         |
| Alpha-actinin-1                            | Actn1       | 0.0070168404170008          |
| Apoptosis-inducing factor 1, mitochondrial | Aifm1       | 0.00646818225054694         |
| Beta-enolase                               | Eno3        | 0                           |
| Fermitin family homolog 2                  | Fermt2      | 0.00973041952464508         |
| Keratin, type II cytoskeletal 8            | Krt8        | 0.00550672455787356         |
| Malate dehydrogenase, cytoplasmic          | Mdh1        | 0.000381825124093165        |
| Myosin-10                                  | Myh10       | 0.00222129668193808         |
| Pyruvate kinase PKM                        | Pkm         | 0.00444912773679897         |
| Regulator of G-protein signaling 18        | Rgs18       | 0.00788484459521408         |
| Serine/threonine-protein kinase VRK1       | Vrk1        | 0.00582120582120582         |
| Tetratricopeptide repeat protein 38        | Ttc38       | 0                           |
| Tubulin alpha-1A chain                     | Tuba1a      | 0.00168705187684521         |
| Tubulin alpha-1B chain                     | Tuba1b      | 0.00168705187684521         |
| Tubulin alpha-3 chain                      | Tuba3a      | 0.00168705187684521         |
| Tubulin alpha-4A chain                     | Tuba4a      | 0.00168705187684521         |
| Tyrosine--tRNA ligase, cytoplasmic         | Yars        | 0.00807511737089202         |

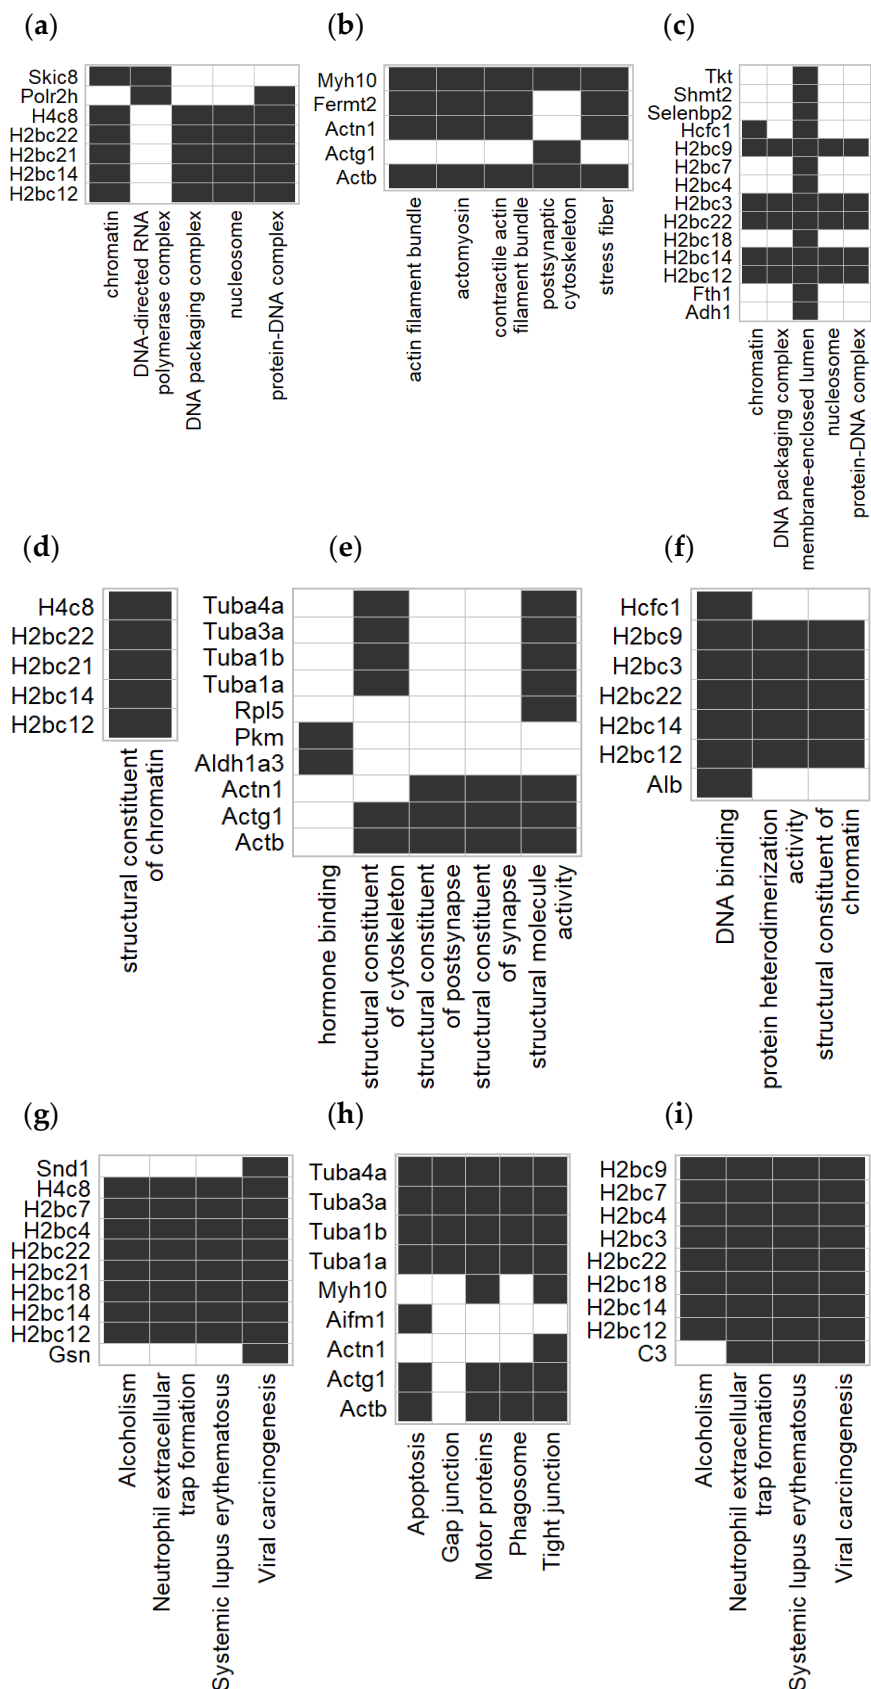

**Figure S5: Enriched terms and their related identified genes, relative to Figure 6.**

**(a)** GO-Cellular Components enrichment analysis of acetylated proteins in HFD gut EVs. **(b)** GO-Cellular Components enrichment analysis of glycated proteins in HFD gut EVs. **(c)** GO-Cellular Components enrichment analysis of glycated proteins in NCD gut EVs. **(d)** GO-Molecular Functions enrichment analysis of acetylated proteins in HFD gut EVs. **(e)** GO-Molecular Functions enrichment analysis of glycated proteins in HFD gut EVs. **(f)** GO-Molecular Functions enrichment analysis of glycated proteins in NCD gut EVs. **(g)** KEGG Pathways enrichment analysis of acetylated proteins in HFD gut EVs. **(h)** KEGG Pathways enrichment analysis of glycated proteins in HFD gut EVs. **(i)** KEGG Pathways enrichment analysis of glycated proteins in NCD gut EVs.

Black rectangles indicate the association between the identified gene and the enriched term.
